# 1 Translation, cultural adaptation, and 2 validation of the PHQ-9 and GAD-7 in 3 Kinyarwanda for primary care in the 4 United States

5  
6 Frank Müller, MD, PhD <sup>a,b,c\*</sup>, Alexis Hansen<sup>a</sup>, Megan Kube, MD <sup>a,d</sup>, Judith E. Arnetz, PhD<sup>a</sup>, Omayma  
7 Alshaarawy, PhD<sup>e</sup>, Eric D. Achtyes, MD, MS<sup>f\*</sup>, Harland T. Holman, MD\* <sup>a,b</sup>

8  
9 <sup>a</sup>Department of Family Medicine, Michigan State University, Grand Rapids, MI 49503, USA

10 <sup>b</sup>Corewell Health Family Medicine Residency Clinic, Grand Rapids, MI 49503, USA

11 <sup>c</sup>Department of General Practice, University Medical Center Göttingen, 37073 Göttingen, Germany

12 <sup>d</sup>Graduate Medical Education in Psychiatry, Trinity Health Livonia Hospital, Livonia, MI 48154, USA

13 <sup>e</sup>Department of Family Medicine, College of Human Medicine, Michigan State University, East Lansing, MI  
14 48824, USA.

15 <sup>f</sup>Department of Psychiatry, Western Michigan University Homer Stryker M.D. School of Medicine,  
16 Kalamazoo, MI 49048, USA

17

18 \* Eric D. Achtyes and Harland T. Holman share senior authorship.

19

20 **Word Count:** 3,446

21

22 **Corresponding author:** Frank Müller, Department of Family Medicine, Michigan State University, 15  
23 Michigan St NE, Grand Rapids MI 49503, [muell313@msu.edu](mailto:muell313@msu.edu)

24

25 **Key words:** Rwanda, mental health, communication barriers, screening, refugees, Kinyarwanda,  
26 PHQ-9, GAD-7

27 **NOTE:** This preprint reports new research that has not been certified by peer review and should not be used to guide clinical practice.

## 28 Abstract

29 **Background:** Depression and anxiety are significant health burdens that greatly impact the quality of  
30 life of refugees and migrants. In this study, we have translated and culturally adapted the Patient  
31 Health Questionnaire (PHQ-9) and Generalized Anxiety Disorder Screener (GAD-7) into Kinyarwanda  
32 and performed a validation study in a United States (US) primary care setting.

33 **Methods:** A committee of experts translated and culturally adapted the PHQ-9 and GAD-7,  
34 incorporating feedback from cognitive interviews with bilingual participants. The translated  
35 instruments were then tested in a cross-sectional validation study. Analyses include internal  
36 consistency, discriminative validity, principal component analyses, and confirmatory factor analyses.

37 **Results:** Analyses of 119 responses indicated overall good internal consistency with Cronbach's  $\alpha$  of  
38 0.85 (PHQ-9) and 0.92 (GAD-7). Both scales showed acceptable factor loadings between 0.44 and 0.90  
39 in the principal component analyses and showed strong correlations with health-related quality of life  
40 and depression/anxiety symptoms measured with visual analog scales. Significantly higher scores for  
41 PHQ-9 and GAD-7 were shown among participants with known psychiatric conditions.

42 **Discussion:** PHQ-9 and GAD-7 demonstrated commendable applicability for Kinyarwanda-speaking  
43 patients in primary healthcare settings in the US. Culturally adapted translations of these tools may aid  
44 in mitigating health disparities among refugee and migrant populations. Future research should further  
45 validate these tools against gold-standard diagnostics in larger, geographically diverse samples.

46

47 **Key words:** Rwanda, mental health, communication barriers, screening, refugees, migrants,  
48 Kinyarwanda, PHQ-9, GAD-7

49

50

## 51 1. Introduction

52 Depression and anxiety are major health burdens and can lead to disability [1], mortality [2], reduced  
53 quality of life [3], and worsening of conditions like diabetes, hypertension, or heart failure [4–6]. The  
54 United States (US) Preventative Services Task Force (USPSTF) has recommended depression screening  
55 in primary care for all adults since 2016 [7] and recently expanded this guideline for anxiety screening  
56 [8].

57 Refugee populations, including refugees from Rwanda [9], are particularly affected by mental health  
58 problems such as depression, anxiety, post-traumatic stress disorder, and other mental conditions  
59 [10–12]. Western Michigan, including the metropolitan area of Grand Rapids, has become one of the  
60 main destinations for refugees and migrants from Rwanda, Uganda, and the Republic of Congo in the  
61 US forming a growing community of Kinyarwanda-speaking residents [13]. Research has demonstrated  
62 that these populations are often both highly traumatized and less likely to seek mental healthcare [14],  
63 further emphasizing the need for high-quality, culturally competent mental health screening.

64 While the Patient Health Questionnaire (PHQ-9), one of the most frequently used mental health  
65 screening instruments [15], has been translated in Kinyarwanda and evaluated among patients with  
66 epilepsy in Rwanda [16], a Kinyarwanda PHQ-9 has not been validated among refugee population in  
67 US primary care settings. Furthermore, a tool to screen for clinically relevant anxiety symptoms such  
68 as the Generalized Anxiety Disorder Screener (GAD-7) [17] has not been translated and validated in  
69 Kinyarwanda.

70 To address this gap in care, the objectives of this work were to translate and culturally adapt the PHQ-9  
71 and GAD-7 into Kinyarwanda and validate both screeners in a cross-sectional study conducted in  
72 primary care clinics in Western Michigan. By publishing these validated instruments as a free resource  
73 for clinicians and researchers, we hope to contribute to the efforts to mitigate health disparities among  
74 refugee and migrant populations.

75

## 76 2. Methods

77 This study was comprised of two phases: In the first phase, the instruments were translated and  
78 culturally adapted using a committee framework approach including cognitive interviews with bilingual  
79 participants. In the second phase, a cross-sectional validation study was conducted in primary care  
80 clinics in Western Michigan. Results of this cross-sectional part are reported using STROBE guidelines  
81 [18].

82

### 83 **Translation and Cultural Adaptation**

84 The committee-based approach to translation and cultural adaptation uses a continuous feedback and  
85 review process within a team of language, culture, and subject matter experts [19]. All commonly used  
86 translation and adaption frameworks entail rigorous steps of planning, parallel translations, review,  
87 adjudication, pilot-testing, revision, and documentation, that can be iterated as necessary [20]. We  
88 extended this framework by conducting cognitive interviews instead of pilot-testing with bilingual  
89 participants and further added an independent back translation as a final quality control before  
90 conducting the validation study. The committee consisted of two clinicians (EDA, HTH) trained in family  
91 medicine and psychiatry, a clinician-researcher (FM) additionally trained in psychosomatic medicine,  
92 one psychiatry resident physician (MK), and one medical student (AH), and two trained medical  
93 Kinyarwanda interpreters who have been working for the healthcare system as on-site medical  
94 interpreters for several years. Interpreters were of male and female sex, middle-aged, and both grew  
95 up in Rwanda and the US and thus were proficient in both Kinyarwanda and the English language. The  
96 process of translation and cultural adaption was completed in six teleconference meetings using Zoom  
97 video conferencing software (Zoom Video Communications, Inc., San Jose, CA, USA), each lasting over  
98 60 minutes between April and June 2022.

99 For the translation process, the English versions of the GAD7 and PHQ9 were used as sources and  
100 subsequently translated and adapted into Kinyarwanda. Kinyarwanda is a Bantu language with

101 different dialectal variants spoken in Rwanda and also in parts of Burundi, the Democratic Republic  
102 of the Congo, Uganda, and Tanzania. The aim for the translation and adaption process agreed upon  
103 among all authors was to generate a semantically similar version retaining format, scales, range of  
104 response options, and stimulus questions while using plain and familiar language allowing the  
105 instruments to be understood by people speaking different dialectal variants and from a diverse  
106 educational background.

107 In the preparation step we first conducted a literature review on existing healthcare survey  
108 instruments in the Kinyarwanda language to gain insights about potential obstacles that others faced  
109 during the translation process. Furthermore, these collected instruments served as a reference in the  
110 committee discussions. During the first meeting, the process of translation and cultural adaptation was  
111 discussed. The PHQ-9 and GAD-7 were introduced, and the clinicians described how these instruments  
112 were used and results interpreted in everyday practice. Furthermore, the interpreters provided  
113 insights into the cultural perception of mental health problems among the Kinyarwanda-speaking  
114 refugee community in the US and the relevant impact on the translation and adaptation process. They  
115 highlighted that mental health problems are often stigmatized among Kinyarwanda communities, and  
116 they expressed their fear that the use of stigmatized expressions would lead to biased responses and  
117 should thus be avoided. The interpreters furthermore shared that many in the community feared being  
118 labeled as “crazy” or “mad” and were afraid that a suspicious test result would implicate that their  
119 “children will be taken away”.

120 After this first meeting, both interpreters independently translated the instruments within two weeks  
121 (parallel forward translation). Additionally, clinicians provided paraphrases and elaborations  
122 independently on the meaning of each item, e.g. “This item is designed to address the idea of  
123 anhedonia, not enjoying things one previously used to enjoy”. The results of these first interpretations  
124 were compiled in a Microsoft Excel (Microsoft Corp., Redmond, WA) document together with the PHQ-  
125 9 version used in the study of Sebera et al. [16] as preparation for the following committee review.

126 In the following four review meetings each item was first introduced by the clinicians and explained  
127 what role it plays in patients with clinically relevant depression or anxiety symptoms. The interpreters  
128 then discussed matching phrasing to concepts and meanings as well as the format and distinction of  
129 questions and responses. Especially challenging was the translation of colloquial metaphors in the  
130 English version, such as “feeling on edge” and finding expressions that avoid stigma. Here it became  
131 apparent, that even basic wording like “mental health” itself would imply “madness” or “craziness” in  
132 a direct translation. In the following meetings, the items were further refined and compiled into a first  
133 draft, consisting of four pages.

134 This draft was then reviewed in the adjudication meeting, where interpreters checked also for  
135 contingency, grammar, and spelling. After final revisions, interpreters and clinicians prepared for pilot  
136 testing.

137 The pilot testing was conducted as cognitive interviews with n=5 bilingual English/Kinyarwanda  
138 participants (3 male, 2 female), that we recruited through the Michigan State University Department  
139 of African Language. All participants were faculty or students of various academic backgrounds located  
140 in the US and the Democratic Republic of the Congo. Cognitive interviews were carried out and video-  
141 and audio-recorded using Zoom teleconferencing software. The cognitive interviews were meant to  
142 assess the cognitive process in answering questions, e.g. if the items were understood  
143 (comprehension), and if necessary and relevant information and underlying concepts were retrieved  
144 (retrieval). Furthermore, we aimed to gain insights into the process of answer preparation of  
145 participants (judgment) and if challenges arose from formatting the answers (response) [21]. The pilot  
146 testing thus did not only focus on the survey items themselves but also the handling of the survey as a  
147 whole. Participants were first introduced to the purpose of the questionnaire and that it is  
148 administered as a standard screening instrument in a family medicine clinic during every patient visit.  
149 Then participants were asked to read out loud each item, answer it, then describe their thought  
150 process that led them to their final answer [22]. After completing all items, participants were asked to  
151 comment if any items were complex, hard to understand, perceived as odd or disturbing, or contained

152 grammatical or spelling errors. The recorded video of each interview was reviewed by the study team  
153 and concerns raised by interviewees were summarized. Furthermore, a certified external interpreter  
154 who was not involved in the research project provided back-translation of both survey instruments.

155 The notes from the cognitive interviews and the results from the back-translation were then discussed  
156 in a final consensus meeting and the survey was finalized. The final version of the translated  
157 instruments are included with this manuscript as a supplemental file.

158

### 159 **Participant Recruitment and Setting**

160 Corewell Health is a large non-profit managed healthcare organization with 22 hospitals and more than  
161 300 outpatient facilities in Michigan. Participants were enrolled in two ways: First, three family  
162 medicine clinics in Western Michigan that provided care to the Kinyarwanda community enrolled  
163 patients in their clinics during their routine clinic visits. Second, a Kinyarwanda interpreter at the  
164 healthcare system was briefed to enroll patients in all other primary care clinics in the health system.  
165 Results of the survey were reported to the provider with the notice that the information obtained was  
166 based on a not-yet-validated scale and therefore typical thresholds of the screening instruments may  
167 not apply. Recruitment took place from June 2022 to August 2023.

168

169 Patients were eligible to participate, if their preferred language for the encounter was (a) Kinyarwanda  
170 and a language interpreter was needed, (b) patients were aged 18 or older, and (c) patients agreed to  
171 participate. Exclusion criteria were (a) lack of Kinyarwanda proficiency or lack of need for language  
172 interpretation, (b) patients aged 17 or below, (c) patients refusing to participate, or not being able to  
173 provide informed consent.

174 Patients who met the sociodemographic eligibility criteria were asked by the staff of the participating  
175 clinics or the interpreter if they would like to participate. If they agreed, they were asked to read the

176 first part of the paper-and-pencil survey that introduces the objectives of the research, that  
177 participation was voluntary, and that only anonymized data were collected and processed. If they  
178 agreed with this statement, they were asked to proceed with the survey. Patients did not receive  
179 compensation for participating in this study.

## 180 **Measures**

181 Besides the two translated instruments PHQ-9 and GAD-7, the survey comprised questions on  
182 participants' sociodemographic characteristics (gender, age, education, timing of entrance into the US,  
183 self-perceived English language proficiency) as well as if the patient has ever been told by a health care  
184 provider that they have a mental health problem (such as depression, anxiety, schizophrenia, bipolar  
185 disorder, obsessive/compulsive disorder, a substance use disorder, or other mental health problems).  
186 These items were translated in the same process as described above. As illness concepts such as bipolar  
187 disorder do not have a direct translation in the Kinyarwanda language, we added a short description  
188 highlighting the main symptoms.

189 Furthermore, the survey contained the Kinyarwanda version of the EQ5D-VAS to measure patients  
190 self-rated overall health [23] on a scale from 0 (“worst health you can imagine”) to 100 (“best health  
191 you can imagine”). Although the Kinyarwanda EQ5D-VAS was thoroughly translated and provided as  
192 an official resource through the EuroQol group, we could not find any literature that these instruments  
193 have been previously validated in Kinyarwanda. To broadly assess depression and anxiety symptoms  
194 in our sample and to compare them to PHQ-9 and GAD-7 items, we added further visual analog scales  
195 with the questions “Overall in the last 30 days, how depressed have you felt?” and “Overall in the last  
196 30 days, how anxious have you felt?”. Similar scales have been used and validated in other settings  
197 [24].

198 Besides these numerical measures, we also checked each completed survey for annotations made by  
199 the respondents.

200



201 **Sample Size**

202 For validation studies, typically an item-to-response ratio from 1:5 to 1:10 is favored [25], suggesting  
203 we needed at least 90 responses for the PHQ-9 and 70 responses for the PHQ-7.

204

205 **Statistical Analysis**

206 Descriptive statistics including frequencies, percentages, means and standard deviations (SD) were  
207 used to characterize our sample and the survey responses. Internal consistency of both scales was  
208 assessed with Cronbach's  $\alpha$  and McDonald's  $\Omega$ . Sensitivity analyses for consistency were conducted  
209 among various sociodemographic subgroups. For each item of both scales, inter-item and inter-scale  
210 correlations were calculated.

211 After assessing Kaiser-Meyer-Olkin-Criteria (KMO) and performing Bartlett's test of sphericity,  
212 principal component analyses (PCA) were used to extract factor loadings. Furthermore, confirmatory  
213 factor analyses (CFA) were used to test the known one-factor model of both instruments [26,27].  
214 Standardized factor loadings were extracted for each item and are displayed as supplemental  
215 resources.

216 Items were tested whether they had a suitable explanatory power using item-total correlation  
217 thresholds of  $<0.3$  [28] and factor loadings  $<0.32$  [29]. Further, items were checked for inter-item  
218 collinearity using a threshold for correlation coefficient  $> 0.7$ .

219 Discriminatory validity was assessed to compare the sum scores of participants with and without  
220 known psychiatric conditions using the Mann-Whitney- $U$  test. Furthermore, Spearman's rho was used  
221 to calculate correlation coefficients between both psychometric scales and respective visual analog  
222 scales for depression, anxiety, and health-related quality of life (EQ-5D VAS score).

223 All descriptive and bivariate statistics were carried out using SPSS V29 (IBM Corp., Armonk NY) and the  
224 CFA was conducted using AMOS V29 (IBM Corp., Armonk NY).

225

226 **Research Ethics**

227 The study received approval from the Corewell Health Institutional Review Board (Approval #: 2022-  
 228 075). Only anonymized data were collected. Participants received written information and provided  
 229 written consent prior to enrollment.

230

231 **3. Results**

232 **Sample characteristics**

233 In total, we recorded 133 responses of which 14 were excluded due to missing values. Participants  
 234 were predominantly female (68.9%) and had a mean age of 40 years (SD 15.5). Only 10 (8.9%)  
 235 participants reported having a known psychiatric condition, of which anxiety disorder (n=6), PTSD, and  
 236 Depression (each n=4) were the most common. Approximately 17.8% of the participants reported  
 237 having no school education and 42.9% reported speaking English “not at all”. Further  
 238 sociodemographic information is outlined in table 1.

239

240 *Table 1: Participant characteristics*

| Characteristic*                         |                  | Female<br>N=82<br>n (%) | Male<br>N=37<br>n (%) | Total<br>N=119<br>n (%) |
|-----------------------------------------|------------------|-------------------------|-----------------------|-------------------------|
| <b>Sociodemographic characteristics</b> |                  |                         |                       |                         |
| Age                                     | $\bar{x}$ (SD)   | 38.6 (13.6)             | 43.3 (19.1)           | 40.0 (15.5)             |
|                                         | 18-29 years      | 21 (26.3)               | 9 (26.5)              | 30 (26.3)               |
|                                         | 30-49 years      | 45 (56.3)               | 13 (38.2)             | 58 (50.9)               |
|                                         | 50+ years        | 14 (17.5)               | 12 (35.3)             | 26 (22.8)               |
| Education                               | 0-4 school years | 27 (33.3)               | 5 (13.5)              | 32 (27.1)               |
|                                         | 5-9 school years | 20 (24.7)               | 12 (32.4)             | 32 (27.1)               |
|                                         | 10+ school years | 34 (42)                 | 20 (54.1)             | 54 (45.8)               |
| Time in the US                          | <1 year          | 12 (14.6)               | 10 (27)               | 22 (18.5)               |
|                                         | 1-2 years        | 10 (12.2)               | 8 (21.6)              | 18 (15.1)               |
|                                         | 2-3 years        | 5 (6.1)                 | 1 (2.7)               | 6 (5)                   |

|                                  |                          |             |             |             |
|----------------------------------|--------------------------|-------------|-------------|-------------|
|                                  | 3-4 years                | 8 (9.8)     | 4 (10.8)    | 12 (10.1)   |
|                                  | 4-5 years                | 19 (23.2)   | 4 (10.8)    | 23 (19.3)   |
|                                  | >5 years                 | 28 (34.1)   | 10 (27)     | 38 (31.9)   |
| English proficiency              | not at all               | 38 (46.3)   | 13 (35.1)   | 51 (42.9)   |
|                                  | Beginner                 | 27 (32.9)   | 11 (29.7)   | 38 (31.9)   |
|                                  | intermediate             | 13 (15.9)   | 12 (32.4)   | 25 (21)     |
|                                  | Advanced                 | 1 (1.2)     | 0 (0)       | 1 (0.8)     |
|                                  | Fluent                   | 3 (3.7)     | 1 (2.7)     | 4 (3.4)     |
| Psychiatric condition            |                          | 5 (6.6)     | 5 (13.9)    | 10 (8.9)    |
| <b>Psychometrics<sup>#</sup></b> |                          |             |             |             |
| EQ-5D VAS score                  | $\bar{x}$ (SD)           | 81.1 (23.8) | 75 (20.6)   | 79.3 (22.9) |
| Self-Perceived Anxiety           | VAS 0-100 $\bar{x}$ (SD) | 4.3 (13.9)  | 15.7 (27.8) | 10.5 (21.0) |
| Self-Perceived Depression        | VAS 0-100 $\bar{x}$ (SD) | 7.8 (18.6)  | 16.8 (24.8) | 7.8 (19.8)  |
| PHQ-9 Sum Score                  | 0-27 $\bar{x}$ (SD)      | 1.7 (2.7)   | 2.9 (4.5)   | 2.0 (3.4)   |
| GAD-7 Sum Score                  | 0-21, $\bar{x}$ (SD)     | 1.0 (2.6)   | 1.4 (3.6)   | 1.1 (2.9)   |

241 \* Missing age n=5, Missing education n=1, psychiatric condition missing n=7, EQ-5D VAS missing n=5,  
 242 Anxiety VAS missing n= 2, Depression VAS missing = 1, # EQ-5D: Higher scores indicate better self-  
 243 perceived health, all other scores: Higher scores indicate higher symptom burden.

244

#### 245 **Psychometrics and item characteristics.**

246 Most participants displayed normal depression (PHQ-9 sum score 0-4, 89.9%) and anxiety levels (GAD-  
 247 7 sum score 0-4, 95%). Sum scores of both parameters exhibited a left-skewed distribution with a  
 248 skewness of 3.57 (standard error 0.22) and kurtosis of 18.02 (standard error 0.44) for the PHQ-9 and a  
 249 skewness of 4.37 (standard error 0.22) and kurtosis of 21.07 (standard error 0.44) for the GAD-7. The  
 250 distribution of responses is shown in Figure 1.

251 Inter-item correlation coefficients for the PHQ-9 and GAD-7 ranged between  $r=0.06$  to  $r=0.65$ , and  
 252  $r=0.23$  to  $r=0.65$ , respectively. A heatmap with correlation coefficients can be found as supplemental  
 253 material (Supplemental Table 1). PHQ-9 and GAD-7 sum scores were positively correlated ( $r=0.59$ ,  
 254  $p<0.001$ ).

255

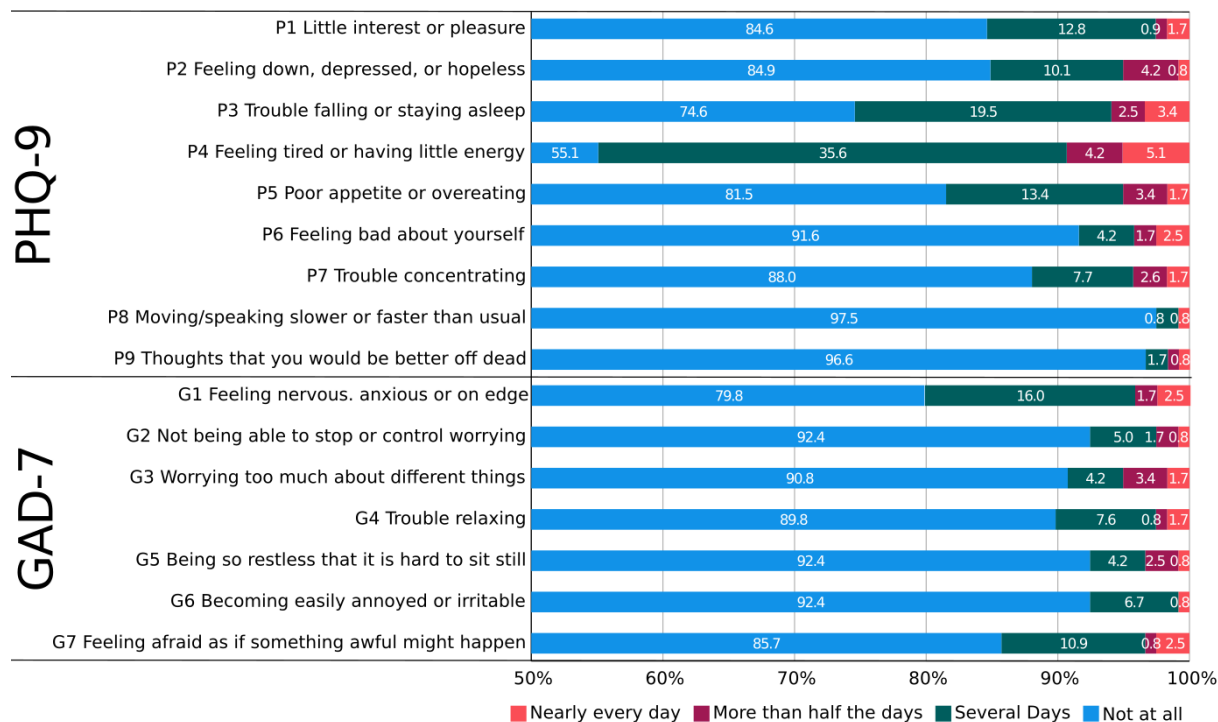

256

257 *Figure 1: Participants' responses.*

258

259 **Reliability**

260 PHQ-9 and GAD-7 displayed overall good internal consistency with a Cronbach's  $\alpha = 0.85$  (McDonald's  
 261  $\Omega = 0.87$ ) and  $\alpha = 0.92$  (McDonald's  $\Omega = 0.93$ ), respectively. Item-total correlations ranged between 0.40  
 262 and 0.69 for the PHQ-9 and 0.68 and 0.85 for the GAD-7. Cronbach's  $\alpha$  did not significantly improve if  
 263 items were removed from the scale.

264 In sensitivity analyses, lower  $\alpha$  values for both PHQ-9 and GAD-7 were found for older respondents  
 265 aged 50+ years, respondents who attempted 0-4 years in school, and respondents with lower self-  
 266 perceived English proficiency and shorter stay in the US (table 2).

267

268 *Table 2: Internal consistency among subgroups*

| Characteristic* |                  | PHQ-9<br>$\alpha$ (95% CI) | GAD-7<br>$\alpha$ (95% CI) |
|-----------------|------------------|----------------------------|----------------------------|
| Age group       | 18-29            | 0.79 (0.66 – 0.89)         | 0.94 (0.90 – 0.97)         |
|                 | 30-49            | 0.90 (0.86 – 0.94)         | 0.93 (0.90 – 0.95)         |
|                 | 50+              | 0.72 (0.52 – 0.86)         | 0.81 (0.68 – 0.91)         |
| Education       | 0-4 school years | 0.78 (0.64 – 0.88)         | 0.83 (0.72 – 0.91)         |

|                     |                  |                    |                    |
|---------------------|------------------|--------------------|--------------------|
|                     | 5-9 school years | 0.75 (0.60 – 0.87) | 0.86 (0.77 – 0.92) |
|                     | 10+ school years | 0.91 (0.86 – 0.94) | 0.94 (0.91 – 0.96) |
| Time in the US      | 0-3 years        | 0.66 (0.49 – 0.79) | 0.56 (0.33 – 0.73) |
|                     | > 3 years        | 0.88 (0.83 – 0.92) | 0.94 (0.92 – 0.96) |
| English proficiency | not at all       | 0.75 (0.62 – 0.84) | 0.76 (0.64 – 0.85) |
|                     | beginner-fluent  | 0.91 (0.88 – 0.94) | 0.95 (0.93 – 0.97) |
| Total               |                  | 0.85 (0.81 – 0.89) | 0.92 (0.89 – 0.94) |

269

270 The Kaiser-Meyer-Olkin (KMO) value was 0.760 for PHQ-9 and Bartlett’s test of sphericity was

271 significant ( $\chi^2$  (36) = 552.53,  $p < 0.001$ ). Similar results were shown for the GAD-7 (KMO value: 0.873,

272 Bartlett’s  $\chi^2$  (21) = 612.56,  $p < 0.001$ ) suggesting both samples as appropriate for factor analyses. A

273 principal component analysis for a single-factor design revealed factor loadings between 0.44 and 0.80

274 for the PHQ-9 and 0.76 to 0.90 for the GAD-7 (table 3).

275 Using CFA, factor loadings ranged between 0.31 and 0.82 for the PHQ-9 and 0.73 and 0.89 for the GAD-

276 7, however, model fit indices for CFAs were poor (Supplement figures S2, S3, and supplement table

277 S1).

278

279 *Table 3: Item characteristics, item-total-correlations, and factor loadings for PHQ-9 (N=114) and GAD-7 (N=118).*

| Item |                                                 | Score |      | Item-Total correlation | $\alpha$ if item deleted | Factor Loading PCA |
|------|-------------------------------------------------|-------|------|------------------------|--------------------------|--------------------|
|      |                                                 | Mean  | SD   |                        |                          |                    |
| P1   | Little interest or pleasure in doing things.    | 0.19  | 0.53 | 0.60                   | 0.83                     | 0.70               |
| P2   | Feeling down, depressed, or hopeless.           | 0.22  | 0.56 | 0.69                   | 0.82                     | 0.79               |
| P3   | Trouble falling or staying asleep.              | 0.34  | 0.68 | 0.59                   | 0.84                     | 0.66               |
| P4   | Feeling tired or having little energy.          | 0.58  | 0.80 | 0.55                   | 0.85                     | 0.64               |
| P5   | Poor appetite or overeating.                    | 0.25  | 0.59 | 0.40                   | 0.85                     | 0.44               |
| P6   | Feeling bad about yourself.                     | 0.16  | 0.57 | 0.69                   | 0.82                     | 0.80               |
| P7   | Trouble concentrating.                          | 0.18  | 0.56 | 0.64                   | 0.83                     | 0.74               |
| P8   | Moving/speaking slower or faster than usual.    | 0.04  | 0.31 | 0.56                   | 0.84                     | 0.72               |
| P9   | Thoughts that you would be better off dead.     | 0.06  | 0.36 | 0.66                   | 0.84                     | 0.80               |
| G1   | Feeling nervous, anxious or on edge.            | 0.27  | 0.62 | 0.68                   | 0.92                     | 0.76               |
| G2   | Not being able to stop or control worrying.     | 0.11  | 0.43 | 0.80                   | 0.90                     | 0.85               |
| G3   | Worrying too much about different things.       | 0.16  | 0.55 | 0.76                   | 0.91                     | 0.83               |
| G4   | Trouble relaxing.                               | 0.14  | 0.49 | 0.73                   | 0.91                     | 0.81               |
| G5   | Being so restless that it is hard to sit still. | 0.12  | 0.46 | 0.85                   | 0.90                     | 0.90               |
| G6   | Becoming easily annoyed or irritable.           | 0.09  | 0.37 | 0.77                   | 0.91                     | 0.84               |
| G7   | Feeling something awful might happen.           | 0.20  | 0.58 | 0.77                   | 0.90                     | 0.84               |

280

281 **Discriminant Validity**

282 Participants with psychiatric comorbidities had significantly higher scores on the PHQ-9 (mean 9.1 [SD  
283 6.7]) compared to those without comorbidity (mean 1.3 [SD 1.8],  $p < 0.001$ ). The same pattern was  
284 observed for the GAD-7 scores, with those with comorbidities scoring higher (mean 5.2 [SD 6.3]) than  
285 those without (mean 0.6 [SD 1.8],  $p < 0.001$ ) (see Figure 2).

286 Self-perceived depression, as measured on a Visual Analog Scale (VAS), exhibited a strong positive  
287 correlation with the PHQ-9 sum score ( $r = 0.53$ ,  $p < 0.001$ ). Similarly, self-perceived anxiety VAS scores  
288 showed a strong positive correlation with the GAD-7 sum score ( $r = 0.65$ ,  $p < 0.001$ ).

289 Health-related quality of life using the EQ-5D VAS score showed a strong negative correlation with the  
290 PHQ-9 sum score ( $r = -0.59$ ,  $p < 0.001$ ) and a moderate negative correlation with the GAD-7 sum score  
291 ( $r = -0.42$ ,  $p < 0.001$ ).

292

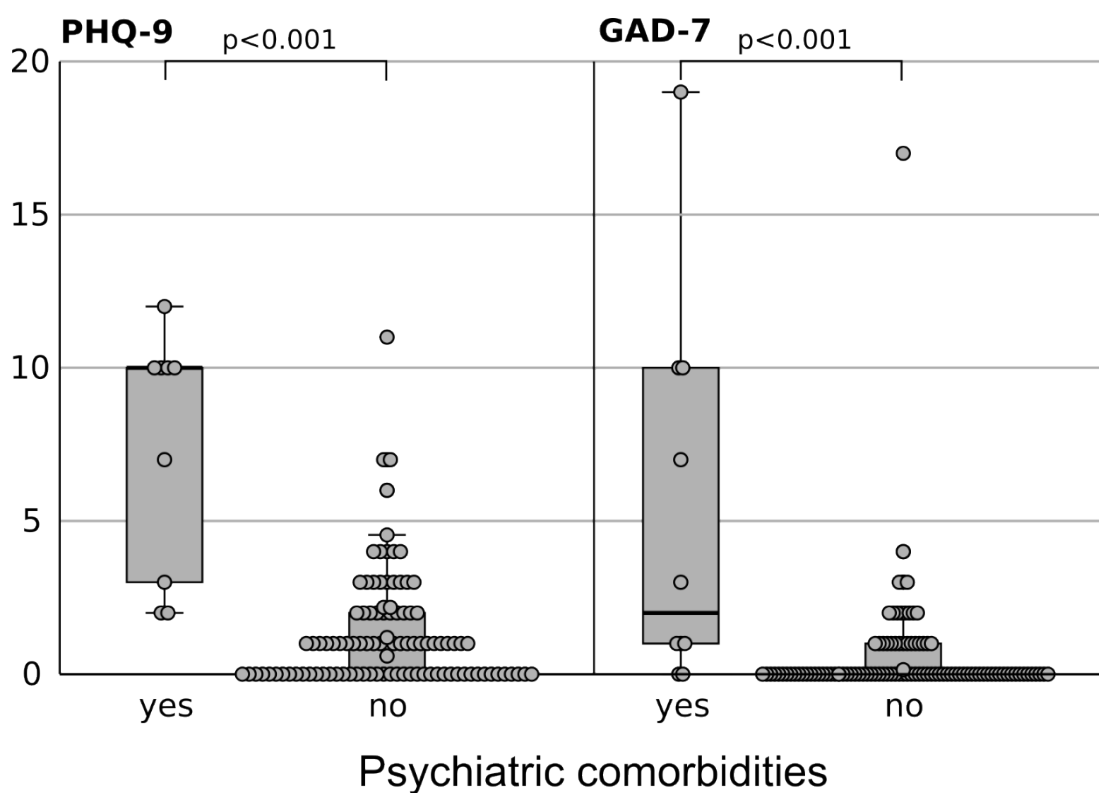

293

294 *Figure 2: PHQ-9 and GAD-7 values among participants with preexisting psychiatric conditions (Mann-Whitney-U test)*

295

296 **Comments**

297 Only few participants made written comments or annotations to the survey, mainly elaborating on  
298 why participants faced trouble falling asleep (P3), referring to environmental noise due to housing  
299 situation or busy roads.

300

#### 301 4. Discussion

302 Studies validating psychometric instruments in a primary care situation for migrants and refugees are  
303 limited, especially for smaller language communities. The lack of availability of these instruments,  
304 however, is a key factor in insufficient mental health screening among refugee and migrant populations  
305 that are particularly affected by the trauma of relocation and mental health problems [30]. This work  
306 aimed to translate and culturally adapt the commonly used mental health screening instruments PHQ-  
307 9 and GAD-7 into the Kinyarwanda language and conduct a validation study by determining internal  
308 consistency, factorial structure, and discriminant validity in a cross-sectional sample of migrant and  
309 refugee patients seeking care in primary care clinics in the Midwest.

310 We found for both instruments an overall good consistency; however, lower consistency levels were  
311 observed among patients who were new to the US, had lower English proficiency levels, or were older  
312 (50+ years). Particularly the PHQ-9 items on poor appetite/overeating and sleeping problems showed  
313 lower factor loadings. However, five items had factor loadings >0.6, suggesting the overall measured  
314 factor as reliable [31].

315 Some participants made annotations to the survey, indicating that their impaired sleep conditions  
316 were due to environmental noise exposure that was associated with their housing situation. Research  
317 has indicated that newly arrived refugees and migrants are often accommodated in shelters, boarding  
318 houses, or substandard apartment buildings that lack privacy and are often exposed to noise that may  
319 impair their sleep [32,33]. Similarly, newly arriving refugees often face considerable challenges in  
320 retaining their food-related practices [34,35], with particular hardships in acquiring goods commonly  
321 consumed in their country of origin while facing a limited budget [36]. As a result newcomers to the  
322 US often face food insecurity [37], which is often further aggravated by language barriers [38]. These

323 aspects likely contribute to a feeling of decreased appetite, especially among newly arrived migrants  
324 without being a clear sign that would indicate an impairment of mental health. This may help explain  
325 the lower consistency among newcomers and lower factor loadings of the respective items in this  
326 cohort.

327 The rather small number of incomplete surveys suggests that the survey questions were understood  
328 well by various patient groups, including those with limited education. The quality of the translation  
329 was confirmed in cognitive interviews.

330 While we have performed a confirmatory factor analysis, the indicated model of fit indices were poor.  
331 It is likely that this is due to a combination of lower factor loadings among some of the previously  
332 discussed items and the vulnerability of goodness of fit indices when analyzing smaller samples [39].

333 Although we were not able to validate our instruments against an established gold standard, we found  
334 that respective sum scores correlated well with visual analog scales for health-related quality of life,  
335 depression, and anxiety. Furthermore, patients with a known history of mental health problems scored  
336 significantly higher for both instruments.

337 This study comes with further limitations that need to be considered when interpreting the results.  
338 Although our sample size met the suggested item-to-response ratios, a considerably larger sample size  
339 would have led to more robust findings, especially among subgroups of the sample, and might have  
340 yielded better goodness-of-fit indices in the confirmatory factor analyses. The majority of enrolled  
341 patients in our sample indicated no or few mental health problems thus reducing variability within our  
342 sample. This could be addressed with either a larger sample or a sample that includes more people  
343 with such problems, e.g. recruited through mental health providers.

344 Recently other psychometric instruments in the Kinyarwanda language have been introduced, such as  
345 the Beck Depression Inventory [40] or the Mini International Neuropsychiatric Interview [41], however,  
346 these were not used in our study as they have not been validated in the respective setting of primary  
347 care clinics in the US.



348 Further research should investigate validity against a standard diagnostic interview in a larger and  
349 more heterogenic sample, e.g. including patients from mental health clinics and psychiatric hospitals.  
350 Such a study could also test diagnostic accuracy and determine cut-off scores for depression and  
351 anxiety screening. With our study, we provide the necessary groundwork including a translated and  
352 culturally adopted version of the PHQ-9 and GAD-7 and the first results of a validation study.

353

354

## 355 References

- 356 1. Weinberger AH, Gbedemah M, Martinez AM, Nash D, Galea S, Goodwin RD. Trends in  
357 depression prevalence in the USA from 2005 to 2015: widening disparities in vulnerable groups.  
358 *Psychol Med.* 2018;48: 1308–1315. doi:10.1017/S0033291717002781
- 359 2. Ösby U, Brandt L, Correia N, Ekblom A, Sparén P. Excess Mortality in Bipolar and Unipolar  
360 Disorder in Sweden. *Arch Gen Psychiatry.* 2001;58: 844. doi:10.1001/archpsyc.58.9.844
- 361 3. Lépine J-P, Briley M. The increasing burden of depression. *NDT.* 2011; 3.  
362 doi:10.2147/NDT.S19617
- 363 4. Barth J, Schumacher M, Herrmann-Lingen C. Depression as a Risk Factor for Mortality in  
364 Patients With Coronary Heart Disease: A Meta-analysis. *Psychosomatic Medicine.* 2004;66:  
365 802–813. doi:10.1097/01.psy.0000146332.53619.b2
- 366 5. Birk JL, Kronish IM, Moise N, Falzon L, Yoon S, Davidson KW. Depression and multimorbidity:  
367 Considering temporal characteristics of the associations between depression and multiple  
368 chronic diseases. *Health Psychology.* 2019;38: 802–811. doi:10.1037/hea0000737
- 369 6. Egede LE, Zheng D, Simpson K. Comorbid Depression is Associated With Increased Health Care  
370 Use and Expenditures in Individuals With Diabetes. *Diabetes Care.* 2002;25: 464–470.  
371 doi:10.2337/diacare.25.3.464
- 372 7. Siu AL, and the US Preventive Services Task Force (USPSTF), Bibbins-Domingo K, Grossman DC,  
373 Baumann LC, Davidson KW, et al. Screening for Depression in Adults: US Preventive Services  
374 Task Force Recommendation Statement. *JAMA.* 2016;315: 380. doi:10.1001/jama.2015.18392
- 375 8. O'Connor E, Henninger M, Perdue LA, Coppola EL, Thomas R, Gaynes BN. Screening for  
376 Depression, Anxiety, and Suicide Risk in Adults: A Systematic Evidence Review for the U.S.  
377 Preventive Services Task Force. Agency for Healthcare Research and Quality; 2022. Report No.:  
378 AHRQ Publication No. 22-05295-EF-1.
- 379 9. Tonui BC. The cultural perceptions on mental health and post-resettlement challenges among  
380 Rwandan refugees in the U.S. *Psychiatry Research.* 2022;313: 114642.  
381 doi:10.1016/j.psychres.2022.114642
- 382 10. Mesa-Vieira C, Haas AD, Buitrago-Garcia D, Roa-Diaz ZM, Minder B, Gamba M, et al. Mental  
383 health of migrants with pre-migration exposure to armed conflict: a systematic review and  
384 meta-analysis. *The Lancet Public Health.* 2022;7: e469–e481. doi:10.1016/S2468-  
385 2667(22)00061-5
- 386 11. Close C, Kouvonen A, Bosqui T, Patel K, O'Reilly D, Donnelly M. The mental health and wellbeing  
387 of first generation migrants: a systematic-narrative review of reviews. *Global Health.* 2016;12:  
388 47. doi:10.1186/s12992-016-0187-3
- 389 12. Abubakar I, Aldridge RW, Devakumar D, Orcutt M, Burns R, Barreto ML, et al. The UCL–Lancet  
390 Commission on Migration and Health: the health of a world on the move. *The Lancet.*  
391 2018;392: 2606–2654. doi:10.1016/S0140-6736(18)32114-7
- 392 13. Rahal S. Michigan becomes haven for Congo refugees. In: *The Detroit News* [Internet]. 12 Apr  
393 2019 [cited 25 Mar 2024]. Available:

- 394 <https://eu.detroitnews.com/story/news/local/michigan/2019/04/12/michigan-becomes->  
395 [haven-congo-refugees/3287895002/](https://eu.detroitnews.com/story/news/local/michigan/2019/04/12/michigan-becomes-haven-congo-refugees/3287895002/)
- 396 14. Byrow Y, Pajak R, Specker P, Nickerson A. Perceptions of mental health and perceived barriers  
397 to mental health help-seeking amongst refugees: A systematic review. *Clinical Psychology*  
398 *Review*. 2020;75: 101812. doi:10.1016/j.cpr.2019.101812
- 399 15. Kroenke K, Spitzer RL, Williams JBW. The PHQ-9: Validity of a brief depression severity measure.  
400 *J Gen Intern Med*. 2001;16: 606–613. doi:10.1046/j.1525-1497.2001.016009606.x
- 401 16. Sebera F, Vissoci JRN, Umwiringirwa J, Teuwen DE, Boon PE, Dedeken P. Validity, reliability and  
402 cut-offs of the Patient Health Questionnaire-9 as a screening tool for depression among  
403 patients living with epilepsy in Rwanda. Tran TD, editor. *PLoS ONE*. 2020;15: e0234095.  
404 doi:10.1371/journal.pone.0234095
- 405 17. Spitzer RL, Kroenke K, Williams JBW, Löwe B. A Brief Measure for Assessing Generalized Anxiety  
406 Disorder: The GAD-7. *Arch Intern Med*. 2006;166: 1092. doi:10.1001/archinte.166.10.1092
- 407 18. von Elm E, Altman DG, Egger M, Pocock SJ, Gøtzsche PC, Vandenbroucke JP, et al. The  
408 Strengthening the Reporting of Observational Studies in Epidemiology (STROBE) statement:  
409 guidelines for reporting observational studies. *J Clin Epidemiol*. 2008;61: 344–349.  
410 doi:10.1016/j.jclinepi.2007.11.008
- 411 19. Behr D. Translating questionnaires for cross-national surveys: A description of a genre and its  
412 particularities based on the ISO 17100 categorization of translator competences. *Trans-Int*.  
413 2018;10: 5–20. doi:10.12807/ti.110202.2018.a02
- 414 20. Valdez D, Montenegro MS, Crawford BL, Turner RC, Lo W-J, Jozkowski KN. Translation  
415 frameworks and questionnaire design approaches as a component of health research and  
416 practice: A discussion and taxonomy of popular translation frameworks and questionnaire  
417 design approaches. *Social Science & Medicine*. 2021;278: 113931.  
418 doi:10.1016/j.socscimed.2021.113931
- 419 21. Schwarz N. Cognitive aspects of survey methodology. *Appl Cognit Psychol*. 2007;21: 277–287.  
420 doi:10.1002/acp.1340
- 421 22. Tourangeau R, Rips LJ, Rasinski K. *The Psychology of Survey Response*. 1st ed. Cambridge  
422 University Press; 2000. doi:10.1017/CBO9780511819322
- 423 23. Rabin R, Charro FD. EQ-SD: a measure of health status from the EuroQol Group. *Annals of*  
424 *Medicine*. 2001;33: 337–343. doi:10.3109/07853890109002087
- 425 24. Huang Z, Kohler IV, Kämpfen F. A Single-Item Visual Analogue Scale (VAS) Measure for  
426 Assessing Depression Among College Students. *Community Ment Health J*. 2020;56: 355–367.  
427 doi:10.1007/s10597-019-00469-7
- 428 25. MacCallum RC, Widaman KF, Zhang S, Hong S. Sample size in factor analysis. *Psychological*  
429 *Methods*. 1999;4: 84–99. doi:10.1037/1082-989X.4.1.84
- 430 26. Gelaye B, Williams MA, Lemma S, Deyessa N, Bahretibeb Y, Shibre T, et al. Validity of the  
431 Patient Health Questionnaire-9 for depression screening and diagnosis in East Africa. *Psychiatry*  
432 *research*. 2013;210: 653–661. doi:10.1016/j.psychres.2013.07.015

- 433 27. Johnson SU, Ulvenes PG, Øktedalen T, Hoffart A. Psychometric Properties of the General  
434 Anxiety Disorder 7-Item (GAD-7) Scale in a Heterogeneous Psychiatric Sample. *Frontiers in*  
435 *psychology*. 2019;10: 1713. doi:10.3389/fpsyg.2019.01713
- 436 28. Cristobal E, Flavián C, Guinalú M. Perceived e-service quality (PeSQ). *Managing Service Quality:*  
437 *An International Journal*. 2007;17: 317–340. doi:10.1108/09604520710744326
- 438 29. Comrey AL, Lee HB. *A first course in factor analysis*. Second edition. New York: Psychology  
439 Press; 2016.
- 440 30. Müller F, Abdelnour AM, Rutaremara DN, Arnetz JE, Achtyes ED, Alshaarawy O, et al. Mental  
441 Health Screening Differences in Non-English Speaking Patients: Results From a Retrospective  
442 Cohort Study. *J Prim Care Community Health*. 2023;14: 21501319231200304.  
443 doi:10.1177/21501319231200304
- 444 31. Field A. *Discovering statistics using SPSS for Windows: Advanced techniques for the beginner*.  
445 Repr. London: Sage Publ; 2004.
- 446 32. Bakker L, Cheung SY, Phillimore J. The Asylum–Integration Paradox: Comparing Asylum Support  
447 Systems and Refugee Integration in The Netherlands and the UK. *International Migration*.  
448 2016;54: 118–132. doi:10.1111/imig.12251
- 449 33. Gewalt SC, Berger S, Ziegler S, Szecsenyi J, Bozorgmehr K. Psychosocial health of asylum seeking  
450 women living in state-provided accommodation in Germany during pregnancy and early  
451 motherhood: A case study exploring the role of social determinants of health. *PloS one*.  
452 2018;13: e0208007. doi:10.1371/journal.pone.0208007
- 453 34. Hersey J, Anliker J, Miller C, Mullis RM, Daugherty S, Das S, et al. Food shopping practices are  
454 associated with dietary quality in low-income households. *Journal of nutrition education*.  
455 2001;33 Suppl 1: S16-26. doi:10.1016/s1499-4046(06)60066-3
- 456 35. Sellen D, Tedstone A, Kerhsen J. *Food in the Migrant Experience*. 2002.
- 457 36. Drewnowski A, Specter SE. Poverty and obesity: the role of energy density and energy costs.  
458 *The American journal of clinical nutrition*. 2004;79: 6–16. doi:10.1093/ajcn/79.1.6
- 459 37. Hadley C, Sellen D. Food security and child hunger among recently resettled Liberian refugees  
460 and asylum seekers: a pilot study. *Journal of immigrant and minority health*. 2006;8: 369–375.  
461 doi:10.1007/s10903-006-9007-9
- 462 38. Himmelgreen D, Pérez-Escamilla R, Segura-Millán S, Peng Y-K, Gonzalez A, Singer M, et al. Food  
463 Insecurity Among Low-Income Hispanics in Hartford, Connecticut: Implications for Public Health  
464 Policy. *Human Organization*. 2000;59: 334–342. doi:10.17730/humo.59.3.76557m317748l414
- 465 39. Sun J. Assessing Goodness of Fit in Confirmatory Factor Analysis. *Measurement and Evaluation*  
466 *in Counseling and Development*. 2005;37: 240–256. doi:10.1080/07481756.2005.11909764
- 467 40. Dedeken P, Nickenig Vissoci JR, Sebera F, Boon PAJM, Rutembesa E, Teuwen DE. Validity,  
468 Reliability, and Diagnostic Cut-off of the Kinyarwanda Version of the Hamilton Depression  
469 Rating Scale in Rwanda. *Frontiers in psychology*. 2020;11: 1343. doi:10.3389/fpsyg.2020.01343
- 470 41. Kayiteshonga Y, Sezibera V, Mugabo L, Iyamuremye JD. Prevalence of mental disorders,  
471 associated co-morbidities, health care knowledge and service utilization in Rwanda - towards a

472 blueprint for promoting mental health care services in low- and middle-income countries? BMC  
473 public health. 2022;22: 1858. doi:10.1186/s12889-022-14165-x  
474

PHQ-9

GAD-7

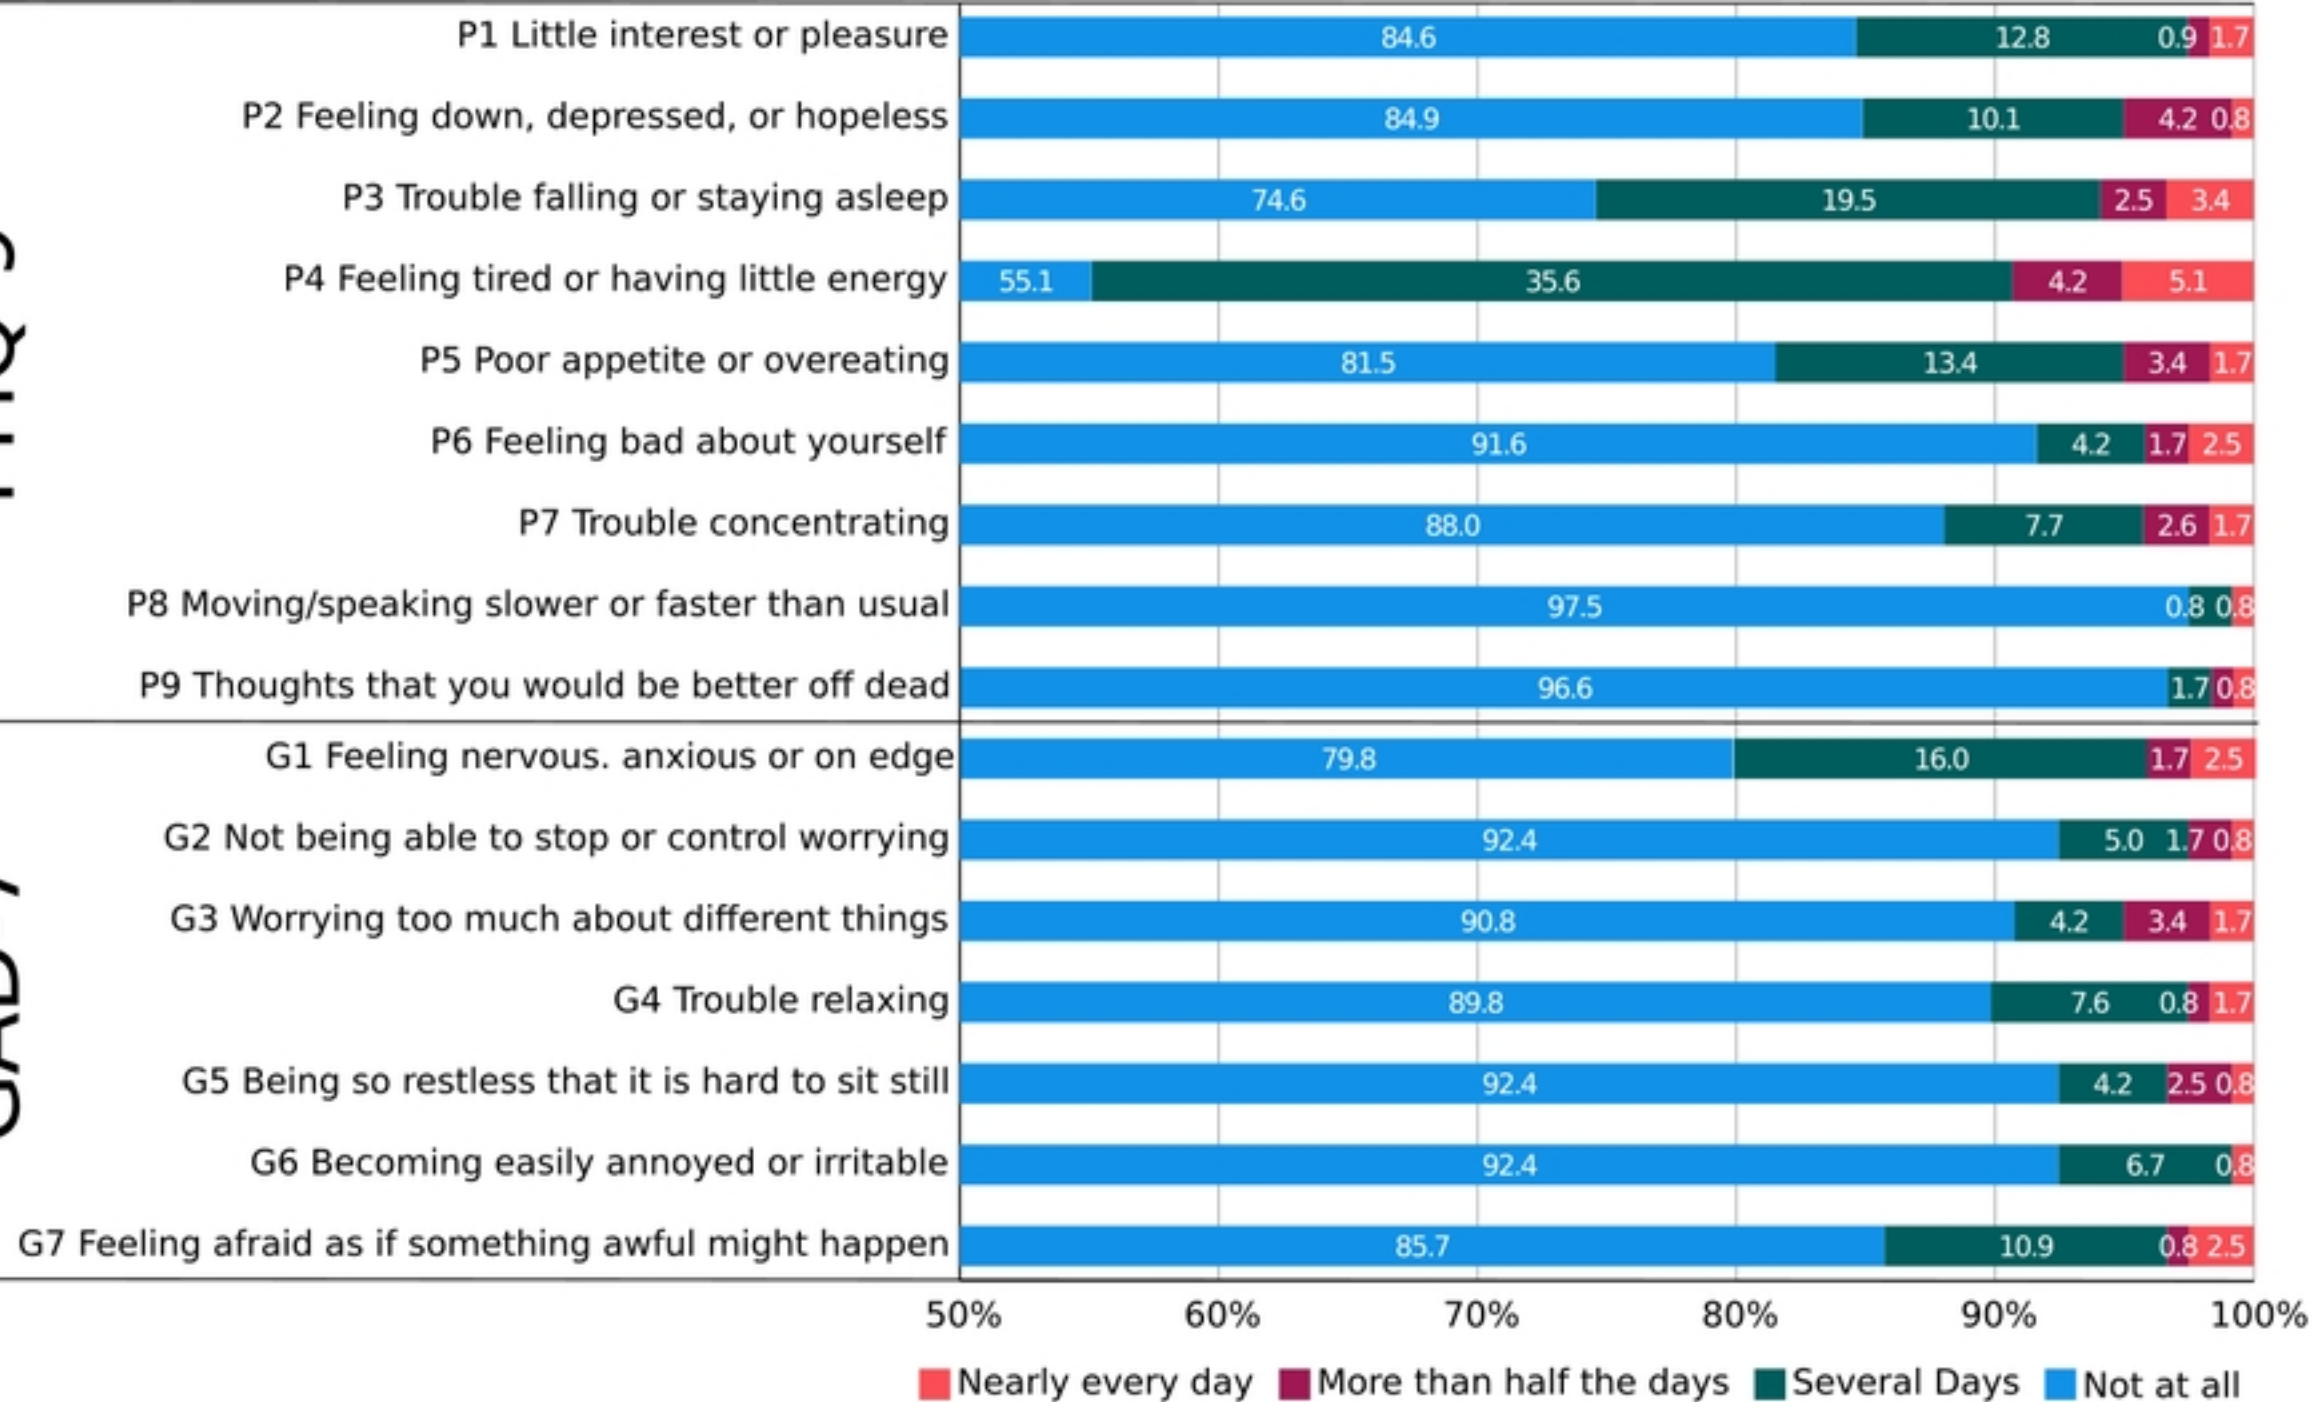

Figure 1

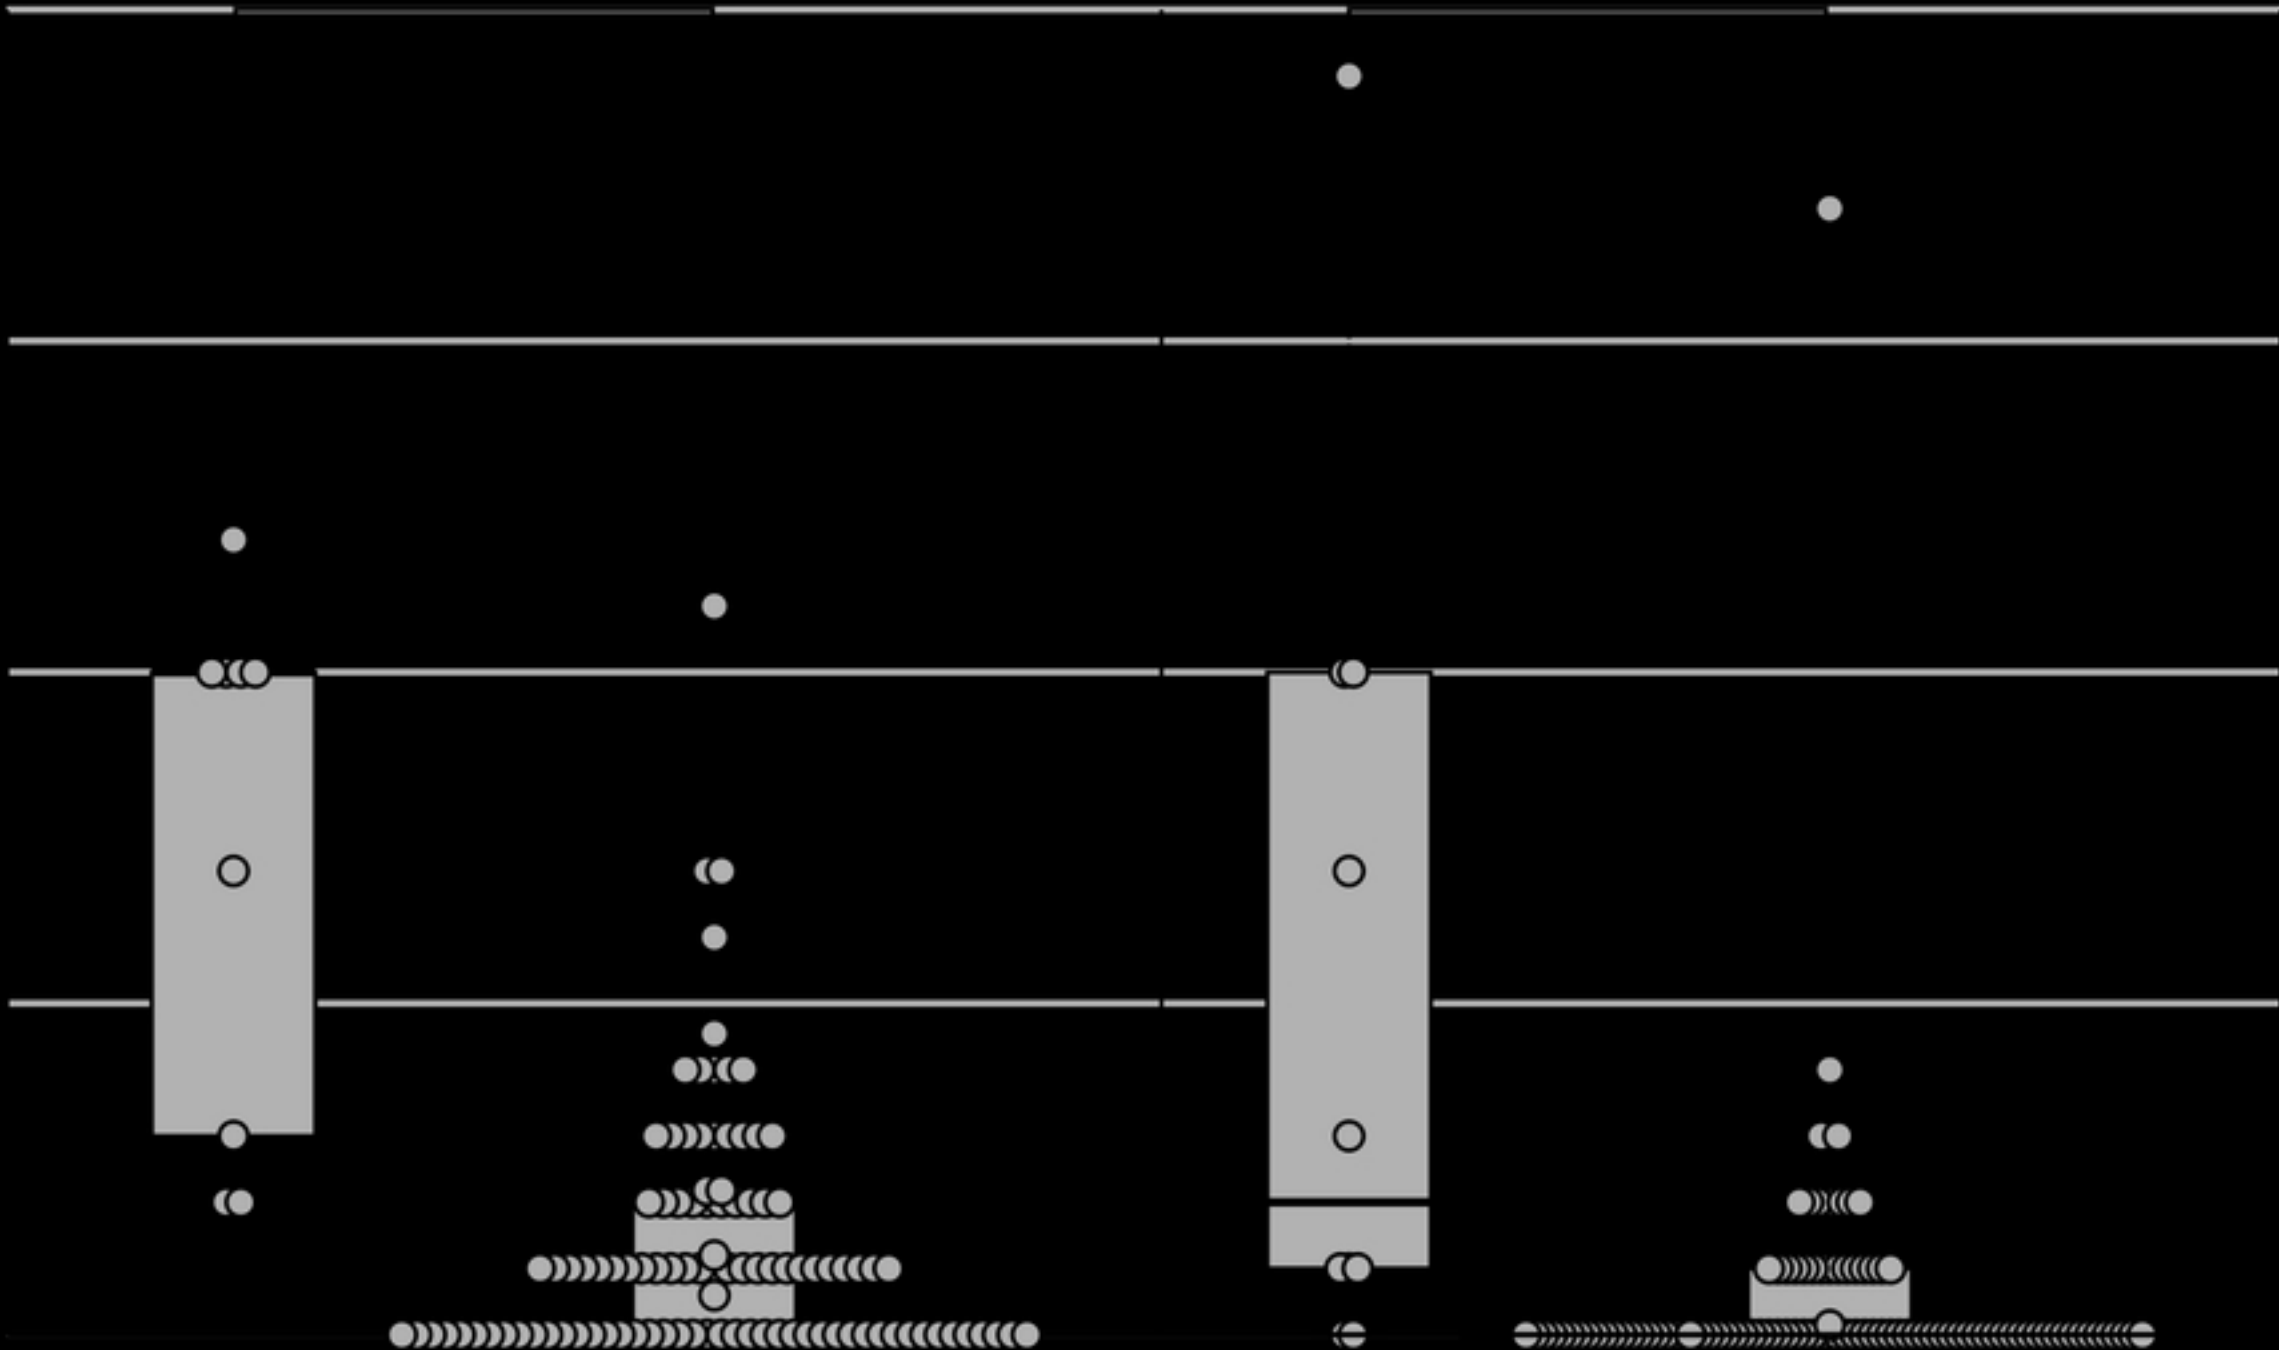

Source: https://www.medrxiv.org/content/10.1101/2024.04.18.24306010.full.pdf
